# Supplementary material
Source: publisher figshare collection journal article supplement (https://tandf.figshare.com/ndownloader/files/22567559)
Supplement: Supplementary file 1 [file 22567559]

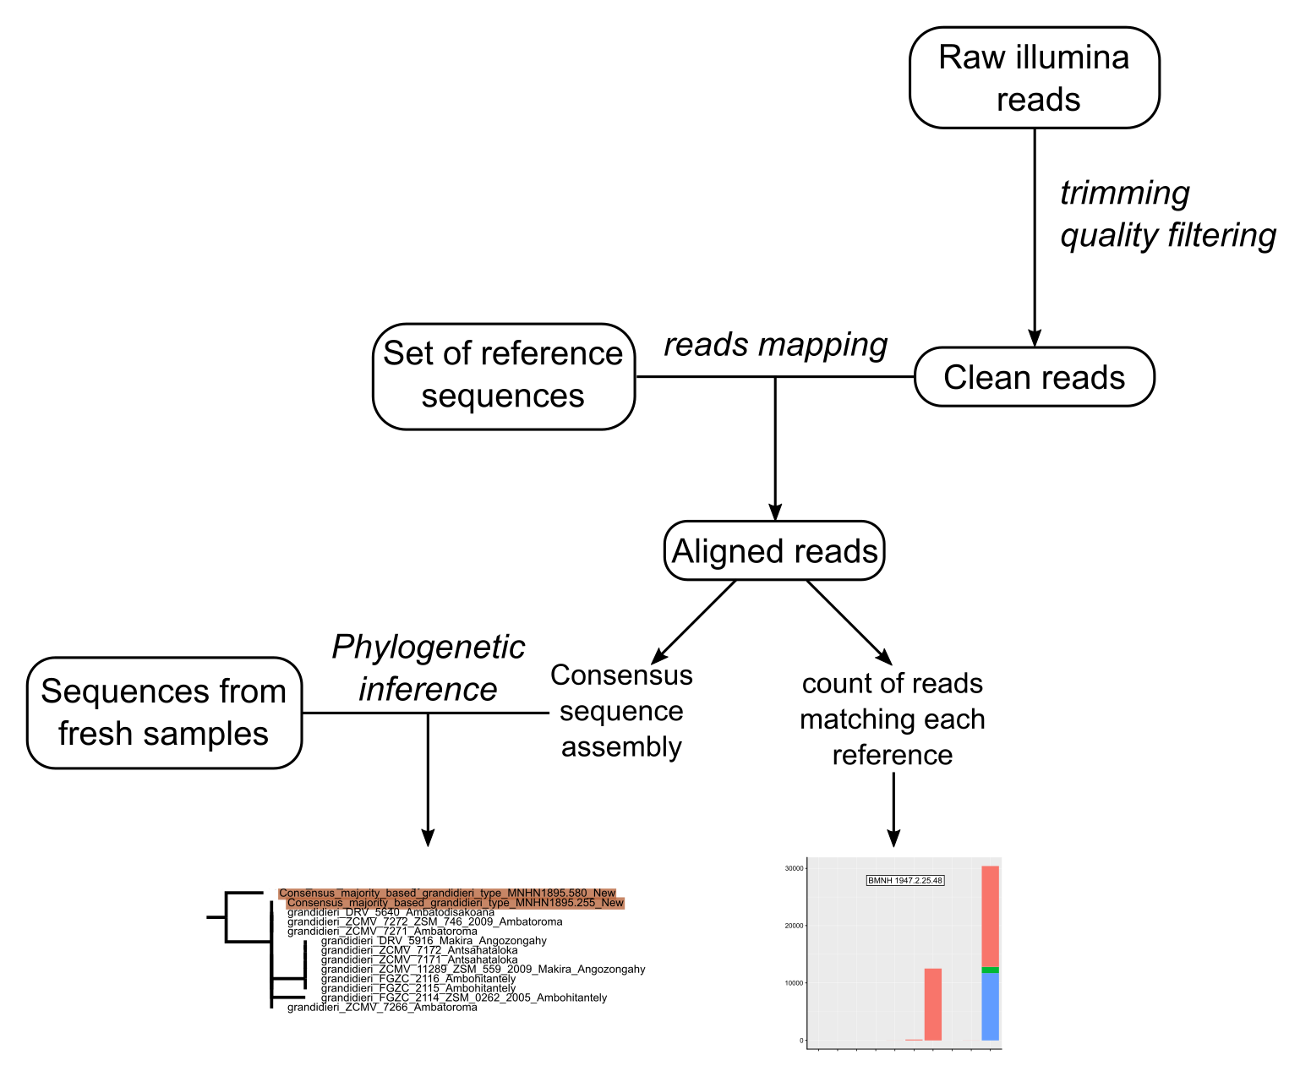
**Figure S1.** Graphical summary of the bioinformatic pipeline used to assign museum specimens to a lineage based on illumina reads.

**
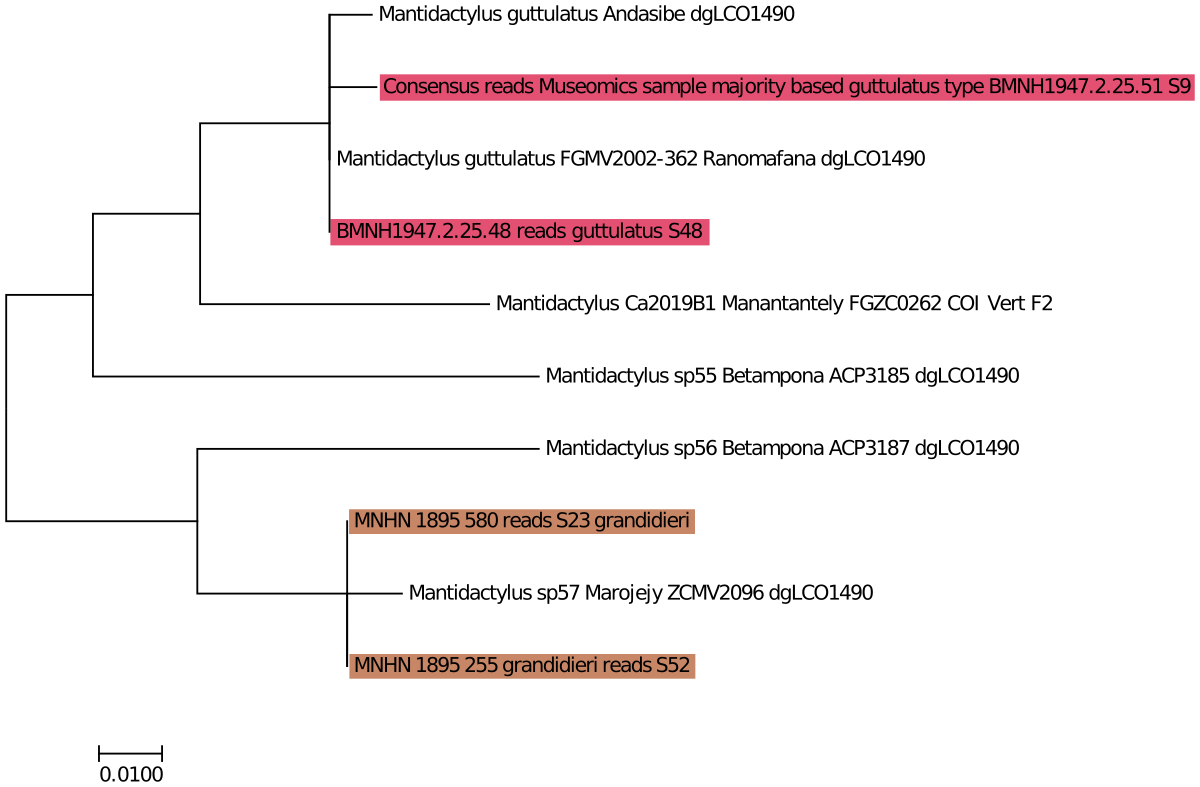
**

**Figure S2.** Tree based on cytochrome oxidase subunit 1 (cox1) sequences, including consensus sequences of four historical type specimens (in red: *Mantidactylus (M.) guttulatus*; in light brown: *M. (M.) grandidieri*).


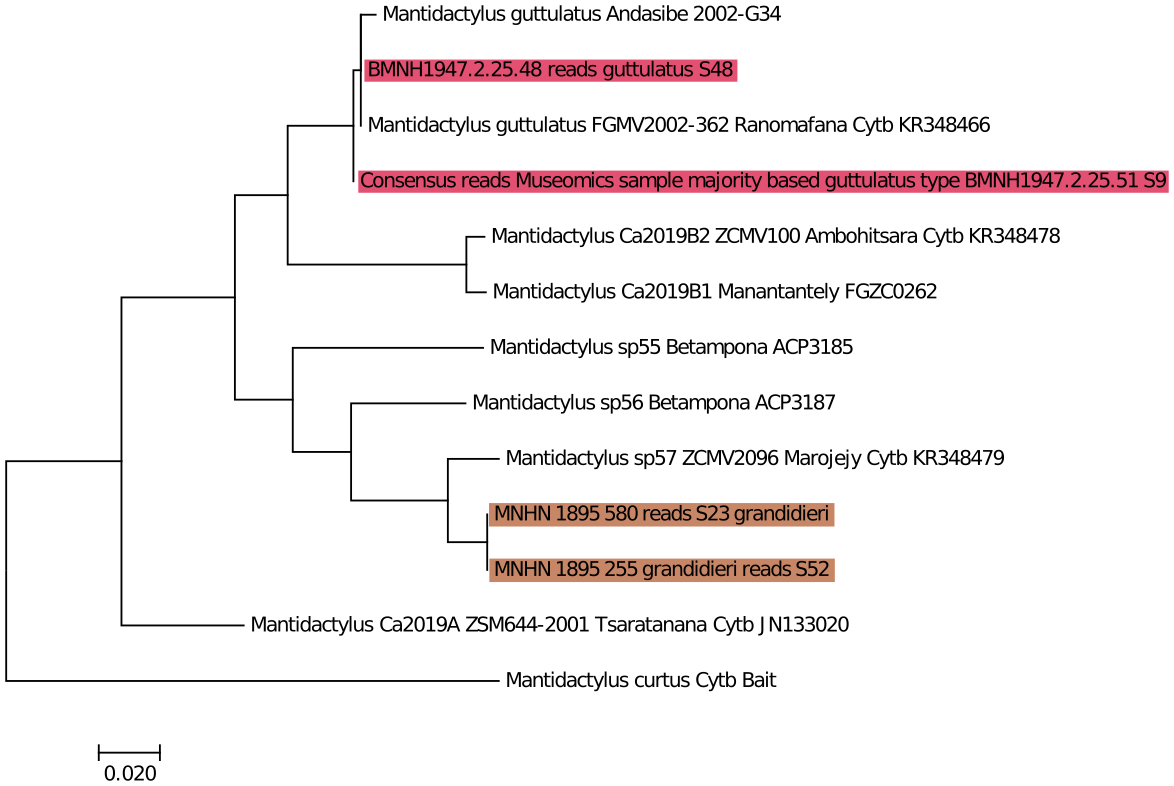


**Figure S3.** Tree based on cytochome b (cob) sequences, including consensus sequences of four historical type specimens (in red: *Mantidactylus (M.) guttulatus*; in light brown: *M. (M.) grandidieri*).


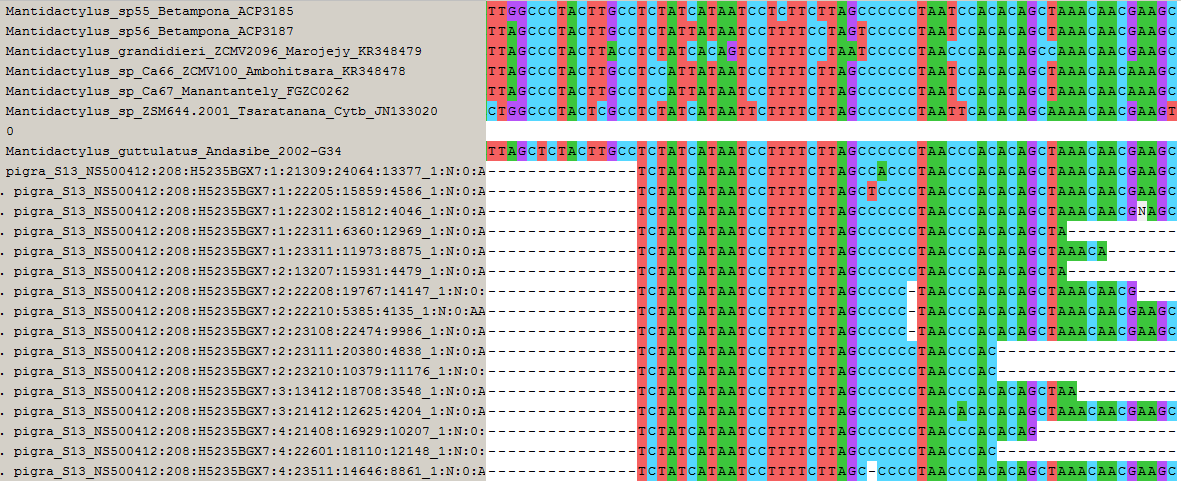


**Figure S4.** Alignment of 16 reads derived from bait capture of the holotype of *Rana pigra* (MNHN 1899.410) that matched the terminal part of the cytochrome b fragment analysed. These reads best match the sequence of the lineage considered to be *Mantidactylus (M.) guttulatus.*
